# Supplementary material for: Motverka fasutsläckningar av grundtonerna för trummorna i ett akustiskt trumset vid inspelning och mixning
Source: Royal Society of Chemistry journal article supplement (doi:10.1039/d4cp00718b), 2007-01-01
Supplement: d4cp00718b1.pdf [file d4cp00718b1.pdf]

Supplementary information for

**High energy barrier hydroxyl radical dissociation mechanism of low  
shock sensitive dihydroxylammonium 5,5'-bistetrazole-1,1'-diolate  
(TKX-50) explosive**

Tuo Yang, Danyang Liu\*, Kun Yang, Jianying Lu, Bin Zhang, Yiwen Xiao, Kaining  
Zhang, Junying Wu and Lang Chen

State Key Laboratory of Explosion Science and Safety Protection, Beijing Institute of Technology,  
Beijing 100081, China

\*email: liudy@bit.edu.cn

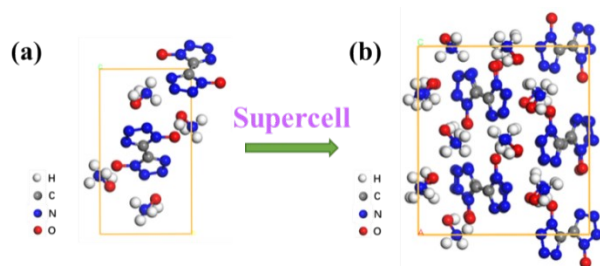

**Fig. S1** (a) Unit cell of TKX-50; (b)  $2 \times 1 \times 2$  supercell of TKX-50.

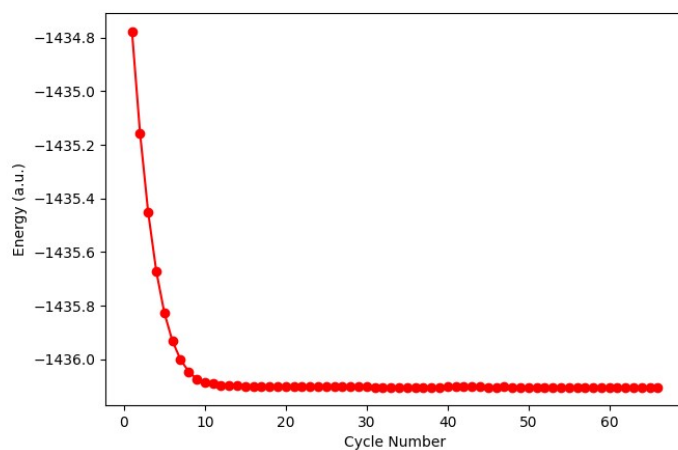

**Fig. S2** Total energy vs. calculation cycle number during the optimization of the TKX-50 supercell.

**Table S1** Unit cell parameters of TKX-50 before and after optimization.

|        | parameters  | density | a/Å   | b/Å        | c/Å   | $\alpha/^\circ$ | $\beta/^\circ$ | $\gamma/^\circ$ |
|--------|-------------|---------|-------|------------|-------|-----------------|----------------|-----------------|
| TKX-50 | Experiment  | 1.915   | 5.426 | 11.66<br>0 | 6.501 | 90.000          | 95.256         | 90.000          |
|        | Calculation | 1.857   | 5.350 | 11.98<br>7 | 6.615 | 90.000          | 95.591         | 90.000          |
|        | Error(%)    | 0.030   | 0.014 | 0.028      | 0.018 | 0.000           | 0.003          | 0.000           |

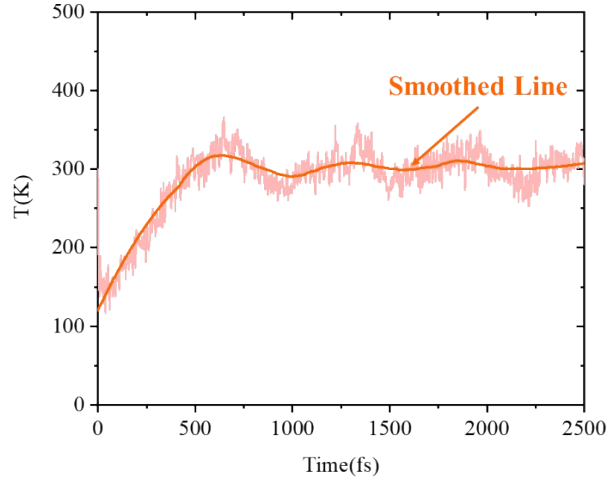

**Fig. S3** Temperature vs. time during the relaxation of TKX-50 supercell by using NVT ensemble.

After about 500 fs, the temperature reaches stability.

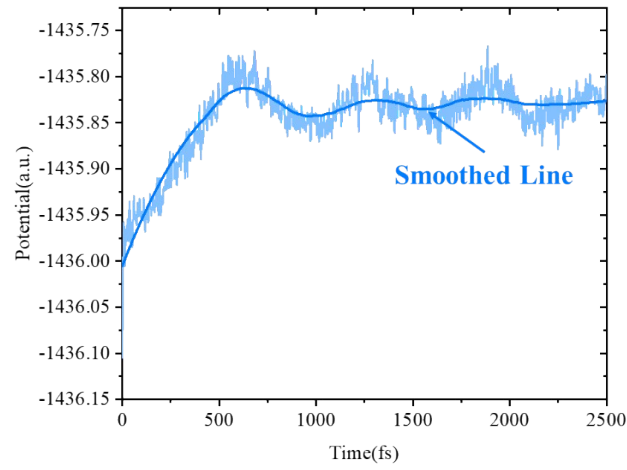

**Fig. S4** Potential energy vs. time during the relaxation of TKX-50 supercell by using NVT

ensemble. After about 500 fs, the potential reaches stability.

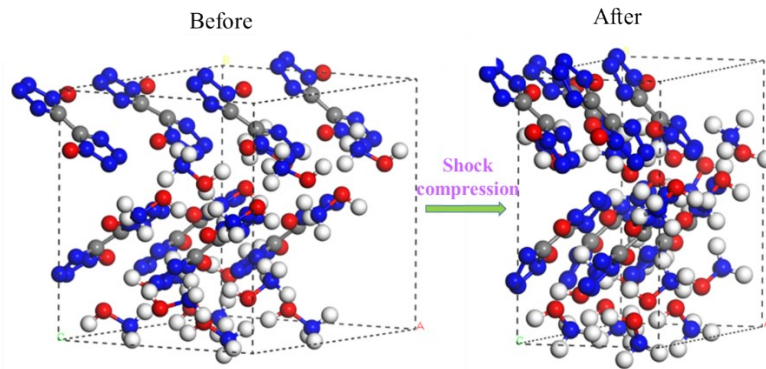

**Fig. S5** TKX-50 supercell before and after shock loading at 10km/s shock velocity. The supercell

is compressed in the A direction.

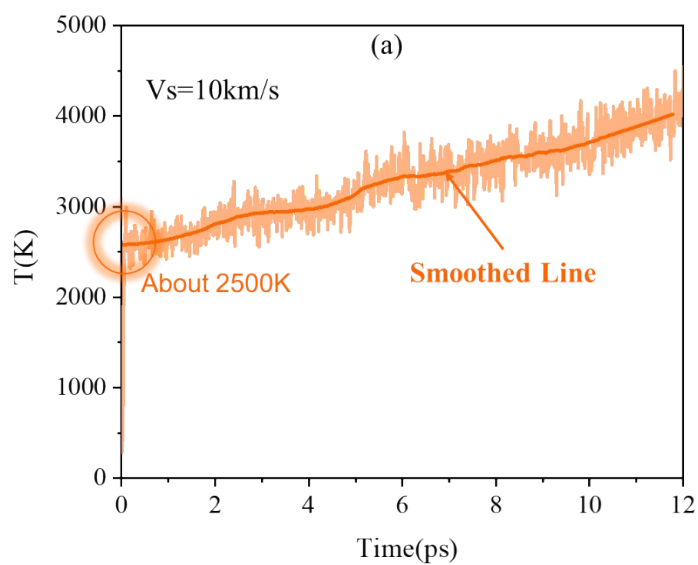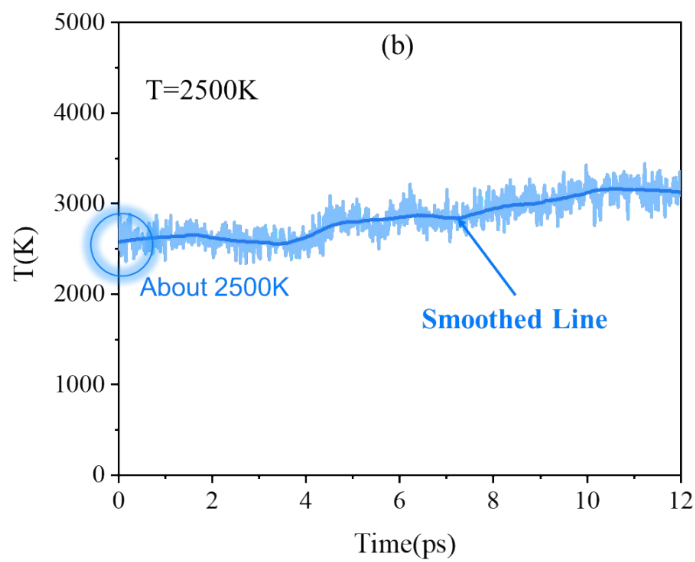

**Fig. S6** Time evolution of the temperature of the TKX-50 supercell at 10km/s shock velocity by MSST(a) and 2500K thermal stimuli by NVE ensemble (b). The initial temperatures are both around 2500 K. The subsequent temperature changes are different indicating different reactions under different stimuli.

**Table S2** Initial elementary reaction, frequencies, and reaction time of TKX-50 under shock velocity of 10km/s.

| total frequencies | frequencies | time(ps)                                                             | elementary reactions                                                                                                                               | illustration                                          |
|-------------------|-------------|----------------------------------------------------------------------|----------------------------------------------------------------------------------------------------------------------------------------------------|-------------------------------------------------------|
| 3                 | 3           | 0-0.25                                                               | $\text{H}_4\text{NO} + \text{C}_2\text{N}_8\text{O}_2 = \text{C}_2\text{H}_4\text{N}_9\text{O}_3$                                                  | polymerization                                        |
| 13                | 13          | 0.05-3.3                                                             | $\text{H}_4\text{NO} = \text{H} + \text{H}_3\text{NO}$                                                                                             | generate $\text{H}^+$                                 |
| 10                | 10          | 0.18-2.55                                                            | $\text{H} + \text{H}_3\text{NO} = \text{H}_4\text{NO}$                                                                                             | $\text{H}_3\text{NO}$ capture $\text{H}^+$            |
| 22                | 2           | 0.05-0.05                                                            | $\text{H}_4\text{NO} + \text{C}_2\text{N}_8\text{O}_2 = \text{H}_3\text{NO} + \text{C}_2\text{HN}_8\text{O}_2$                                     | $\text{C}_2\text{N}_8\text{O}_2$ capture $\text{H}^+$ |
|                   | 1           | 0.05-0.05                                                            | $\text{C}_2\text{N}_8\text{O}_2 + \text{C}_2\text{H}_4\text{N}_9\text{O}_3 = \text{H}_3\text{NO} + \text{C}_4\text{HN}_{16}\text{O}_4$             |                                                       |
|                   | 3           | 0.3-0.8                                                              | $\text{C}_2\text{H}_4\text{N}_9\text{O}_3 = \text{H}_3\text{NO} + \text{C}_2\text{HN}_8\text{O}_2$                                                 |                                                       |
|                   | 3           | 0.65-4.35                                                            | $\text{C}_2\text{N}_8\text{O}_2 + \text{C}_2\text{H}_2\text{N}_8\text{O}_2 = \text{C}_2\text{HN}_8\text{O}_2 + \text{C}_2\text{HN}_8\text{O}_2$    |                                                       |
|                   | 2           | 0.85-4.75                                                            | $\text{H} + \text{C}_2\text{N}_8 = \text{C}_2\text{HN}_8$                                                                                          |                                                       |
|                   | 3           | 1.9-2.8                                                              | $\text{H}_3\text{NO} + \text{C}_2\text{N}_8\text{O}_2 = \text{H}_2\text{NO} + \text{C}_2\text{HN}_8\text{O}_2$                                     |                                                       |
|                   | 3           | 1.95-4.45                                                            | $\text{H}_3\text{O} + \text{C}_2\text{N}_8\text{O}_2 = \text{H}_2\text{O} + \text{C}_2\text{HN}_8\text{O}_2$                                       |                                                       |
|                   | 3           | 2.6-7.25                                                             | $\text{H} + \text{C}_2\text{HN}_8 = \text{C}_2\text{H}_2\text{N}_8$                                                                                |                                                       |
|                   | 2           | 3.15-6                                                               | $\text{H} + \text{C}_2\text{N}_8\text{O}_2 = \text{C}_2\text{HN}_8\text{O}_2$                                                                      |                                                       |
|                   | 22          | 5                                                                    | 0.6-2.45                                                                                                                                           |                                                       |
| 5                 |             | 0.65-3.25                                                            | $\text{C}_2\text{HN}_8\text{O}_2 = \text{H} + \text{C}_2\text{N}_8\text{O}_2$                                                                      |                                                       |
| 2                 |             | 1.6-5                                                                | $\text{H}_2\text{O} + \text{C}_2\text{H}_2\text{N}_8\text{O}_2 = \text{H}_3\text{O} + \text{C}_2\text{HN}_8\text{O}_2$                             |                                                       |
| 3                 |             | 2.8-6.05                                                             | $\text{H}_2\text{O} + \text{C}_2\text{HN}_8\text{O}_2 = \text{H}_3\text{O} + \text{C}_2\text{N}_8\text{O}_2$                                       |                                                       |
| 3                 |             | 3.55-7.2                                                             | $\text{C}_2\text{H}_2\text{N}_8 = \text{H} + \text{C}_2\text{HN}_8$                                                                                |                                                       |
| 2                 |             | 4-4.35                                                               | $\text{H}_3\text{N} + \text{C}_2\text{HN}_8\text{O}_2 = \text{H}_4\text{N} + \text{C}_2\text{N}_8\text{O}_2$                                       |                                                       |
| 2                 |             | 4.15-5.45                                                            | $\text{C}_2\text{H}_2\text{N}_8\text{O}_2 = \text{H} + \text{C}_2\text{HN}_8\text{O}_2$                                                            |                                                       |
| 84                | 1           | 0.35-0.35                                                            | $\text{H}_4\text{NO} + \text{H}_4\text{NO} = \text{H}_2\text{O} + \text{H}_3\text{N} + \text{H}_3\text{NO}$                                        | generate $\text{H}_2\text{O}$                         |
|                   | 6           | 0.9-4.95                                                             | $\text{H}_3\text{O} + \text{H}_3\text{NO} = \text{H}_2\text{O} + \text{H}_4\text{NO}$                                                              |                                                       |
|                   | 2           | 1.15-3.2                                                             | $\text{HO} + \text{C}_2\text{H}_2\text{N}_8\text{O} = \text{H}_2\text{O} + \text{C}_2\text{HN}_8\text{O}$                                          |                                                       |
|                   | 12          | 2.8-12.05                                                            | $\text{H}_3\text{O} = \text{H} + \text{H}_2\text{O}$                                                                                               |                                                       |
|                   | 14          | 3.15-12.25                                                           | $\text{H}_4\text{O}_2 = \text{H}_2\text{O} + \text{H}_2\text{O}$                                                                                   |                                                       |
|                   | 35          | 3.45-12.3                                                            | $\text{H} + \text{HO} = \text{H}_2\text{O}$                                                                                                        |                                                       |
|                   | 6           | 5.7-8                                                                | $\text{H}_5\text{NO} = \text{H}_2\text{O} + \text{H}_3\text{N}$                                                                                    |                                                       |
|                   | 6           | 5.85-10.5                                                            | $\text{HO} + \text{H}_3\text{O} = \text{H}_2\text{O} + \text{H}_2\text{O}$                                                                         |                                                       |
| 2                 | 6.55-12.1   | $\text{N}_2 + \text{H}_3\text{O} = \text{HN}_2 + \text{H}_2\text{O}$ |                                                                                                                                                    |                                                       |
| 35                | 1           | 0.35-0.35                                                            | $\text{H}_4\text{NO} + \text{H}_4\text{NO} = \text{H}_2\text{O} + \text{H}_3\text{N} + \text{H}_3\text{NO}$                                        | generate $\text{NH}_3$                                |
|                   | 7           | 3.35-11.15                                                           | $\text{H}_4\text{N} = \text{H} + \text{H}_3\text{N}$                                                                                               |                                                       |
|                   | 21          | 4.55-11.8                                                            | $\text{H} + \text{H}_2\text{N} = \text{H}_3\text{N}$                                                                                               |                                                       |
|                   | 6           | 5.7-8                                                                | $\text{H}_5\text{NO} = \text{H}_2\text{O} + \text{H}_3\text{N}$                                                                                    |                                                       |
| 12                | 2           | 0.95-2.85                                                            | $\text{H}_2\text{N}_2\text{O}_2 = \text{NO} + \text{H} + \text{HNO}$                                                                               | generate NO                                           |
|                   | 4           | 1.75-4.4                                                             | $\text{H}_2\text{N}_2\text{O}_2 = \text{NO} + \text{H}_2\text{NO}$                                                                                 |                                                       |
|                   | 4           | 3.05-10.1                                                            | $\text{HNO} = \text{NO} + \text{H}$                                                                                                                |                                                       |
|                   | 2           | 8.85-10.3                                                            | $\text{HNO}_2 = \text{NO} + \text{HO}$                                                                                                             |                                                       |
| 33                | 1           | 3.55-3.55                                                            | $\text{C}_4\text{H}_7\text{N}_{19}\text{O}_4 = \text{N}_2 + \text{H}_2\text{N} + \text{H}_2\text{O} + \text{C}_4\text{H}_3\text{N}_{16}\text{O}_3$ | generate $\text{N}_2$                                 |
|                   | 1           | 4.55-4.55                                                            | $\text{C}_2\text{HN}_8\text{O} = \text{N}_2 + \text{C}_2\text{HN}_6\text{O}$                                                                       |                                                       |

| total frequencies | frequencies | time(ps)    | elementary reactions                         | illustration    |
|-------------------|-------------|-------------|----------------------------------------------|-----------------|
|                   | 1           | 4.6-4.6     | $C_2H_3N_7O = N_2 + CHNO + CHN_4O$           |                 |
|                   | 1           | 4.8-4.8     | $C_2N_7O_2 = N_2 + C_2N_5O_2$                |                 |
|                   | 1           | 5.4-5.4     | $N_3O = NO + N_2$                            |                 |
|                   | 1           | 6.6-6.6     | $HN_2 + H_2O = N_2 + H_3O$                   |                 |
|                   | 1           | 7.2-7.2     | $C_4H_3N_{12}O_2 = N_2 + N_2 + C_4H_3N_8O_2$ |                 |
|                   | 1           | 7.4-7.4     | $C_4H_2N_{10}O_2 = N_2 + C_4H_2N_8O_2$       |                 |
|                   | 2           | 7.55-8.7    | $H_2N_2O = N_2 + H_2O$                       |                 |
|                   | 2           | 7.75-10.3   | $HO + HN_2 = N_2 + H_2O$                     |                 |
|                   | 1           | 8.85-8.85   | $C_2H_2N_6O = 2N_2 + H_2O + C_2N_2$          |                 |
|                   | 2           | 8.95-10.05  | $HN_2 = N_2 + H$                             |                 |
|                   | 1           | 9.0-9.0     | $HN_2 + CHN_2O_2 = N_2 + CH_2N_2O_2$         |                 |
|                   | 1           | 9.4-9.4     | $HN_5O = N_2 + HN_3O$                        |                 |
|                   | 1           | 9.5-9.5     | $CHN_2O_2 = N_2 + CHO_2$                     |                 |
|                   | 2           | 9.6-9.95    | $CHN_4O = N_2 + CHN_2O$                      |                 |
|                   | 1           | 9.7-9.7     | $H_2O + CN_4O = N_2 + HO + CHN_2O$           |                 |
|                   | 1           | 9.9-9.9     | $C_2H_2N_7O = N_2 + C_2H_2N_5O$              |                 |
|                   | 1           | 9.9-9.9     | $CH_4N_4O_2 = N_2 + H + H_2O + CHN_2O$       |                 |
|                   | 1           | 9.95-9.95   | $H_2O + CHN_4O = N_2 + HO + CH_2N_2O$        |                 |
|                   | 2           | 10.1-10.1   | $CH_2N_4O = N_2 + CH_2N_2O$                  |                 |
|                   | 1           | 10.25-10.25 | $CH_2N_4 = N_2 + H + CHN_2$                  |                 |
|                   | 2           | 11.2-11.9   | $HN_2 + CHN = N_2 + CH_2N$                   |                 |
|                   | 2           | 11.25-11.75 | $CN_2O = N_2 + CO$                           |                 |
|                   | 1           | 12.1-12.1   | $CHN_3 = N_2 + CHN$                          |                 |
|                   | 1           | 12.2-12.2   | $NO_2 + C_2H_4N_5O = N_2 + C_2H_4N_4O_3$     |                 |
| 10                | 10          | 7.37-12.2   | $HN_3 = N_3 + H$                             | generate $N_3$  |
| 9                 | 9           | 8.3-12.25   | $N_3 + H = HN_3$                             | generate $HN_3$ |
|                   | 1           | 9.75-9.75   | $CH_2O_2 = H_2O + CO$                        |                 |
|                   | 2           | 10.45-12.2  | $C_2HNO = CO + CHN$                          |                 |
| 7                 | 2           | 11.25-11.75 | $CN_2O = N_2 + CO$                           | generate CO     |
|                   | 1           | 11.5-11.5   | $CH_4NO = H_4N + CO$                         |                 |
|                   | 1           | 11.9-11.9   | $CN + CH_2O_2 = CO + CH_2NO$                 |                 |

**Table S3** Mulliken fragment charge of the structure before and after H transfer

|                 | Before H transfer  |                                              | After H transfer   |                                                |
|-----------------|--------------------|----------------------------------------------|--------------------|------------------------------------------------|
| Structure       | NH <sub>3</sub> OH | C <sub>2</sub> N <sub>8</sub> O <sub>2</sub> | NH <sub>2</sub> OH | C <sub>2</sub> N <sub>8</sub> O <sub>2</sub> H |
| Mulliken charge | 0.6833             | -1.5830                                      | 0.0456             | -0.7814                                        |

First, we extracted the TKX-50 supercell during the AIMD calculation and used Gaussian 16 software to perform single-point calculations to obtain the .fch file. Next, we used Multiwfn software to calculate the Mulliken fragment charge of the structure before and after the H transfer. The calculation results are shown in the table below. It can be seen that after H transfer, the charge of the cation decreases from 0.6833 to 0.0456, and the charge of the anion changes from -1.5830 to -0.7814. This indicates that the H transfer is a proton transfer.

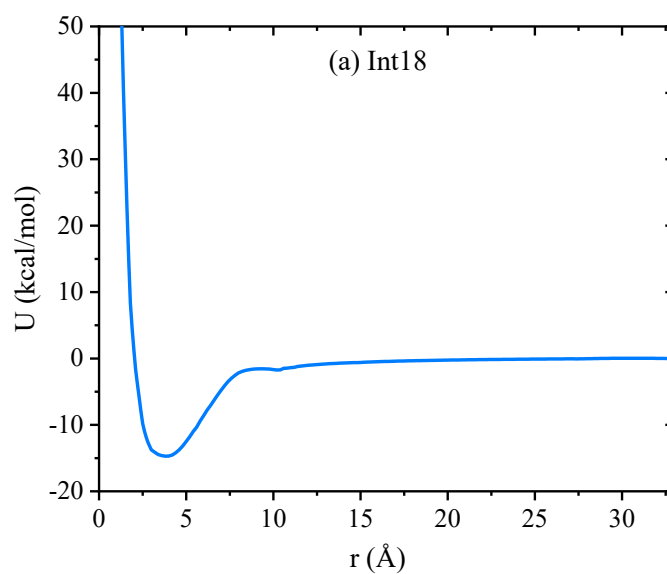

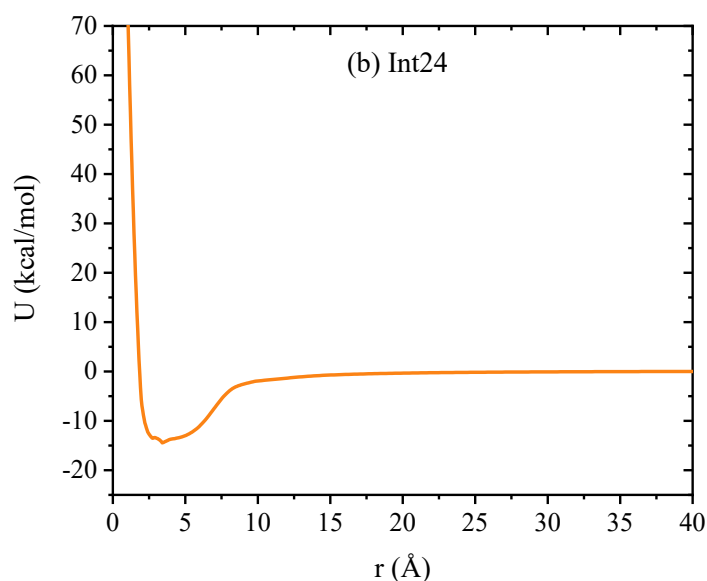

**Fig. S7** Distance-potential energy relationship between  $(C_2N_8O_2H)^-$  and  $H_2O$  by scan calculation through Gaussian16 software at the B3LYP-D3/TZVP level. Then, the Lennard-Jones (L-J) potential is used to simulate the intermolecular interaction between the target species and the bath gas. For Int18 used in this study, the L-J parameters are  $\sigma=2.10\text{\AA}$ ,  $\epsilon/k_B=1.322\times 10^4\text{K}$ . For Int24 the L-J parameters are  $\sigma=1.85\text{\AA}$ ,  $\epsilon/k_B=1.478\times 10^4\text{K}$ . The L-J parameters of  $H_2O$  are  $\sigma=2.71\text{\AA}$ ,  $\epsilon/k_B=506\text{K}$ , from the KiSThelP program.

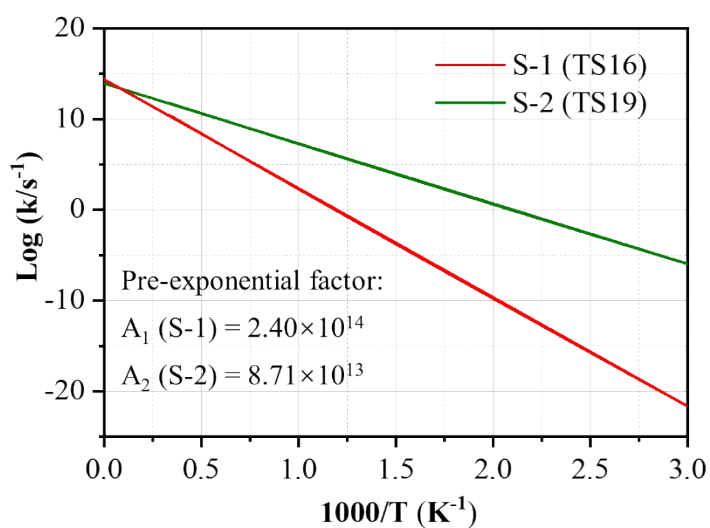

**Fig. S8** Reaction rate constants of paths S-1 and S-2 in Arrhenius coordinate as a function of temperature, calculated using transition state theory (TST). The radical reaction path S-1 ( $A_1=2.40\times 10^{14}$ ) has a higher pre-exponential factor than path S-2 ( $A_2=8.71\times 10^{13}$ ). With increasing temperature, the reaction rate constant differences between the two reactions decrease. High temperature has a stronger promotion of radical reaction which aligns with what we have found in



Fig. 14.

**Table S4** Bond cutoffs

| Bond type | Cutoff(Å) |
|-----------|-----------|
| C-C       | 1.7457    |
| C-H       | 1.2903    |
| C-O       | 1.70775   |
| C-N       | 1.7181    |
| H-H       | 0.8349    |
| H-O       | 1.25235   |
| H-N       | 1.2627    |
| O-O       | 1.6698    |
| O-N       | 1.68015   |
| N-N       | 1.6905    |
